# Supplementary material for: Genome mining of actinomycin shunt products from Kitasatospora sp. YINM00002
Source: Royal Society of Chemistry journal article supplement (doi:10.1039/d3ra07277k), 2023-01-01
Supplement: d3ra07277k1.pdf [file d3ra07277k1.pdf]

## Supporting Information

**Genome Mining of Actinomycin Shunt products from *Kitasatospora* sp.**

**YINM00002**

Zhou-Tian-Le Zhang<sup>a, 1</sup>, Hui-Bing Sun<sup>a, 1</sup>, Zhen Ren<sup>b, 1</sup>, Tian-Peng Xie<sup>a</sup>, Ying-Fang Wang<sup>a</sup>, Yin Guo<sup>a</sup>, Xiaoyu Su<sup>a</sup>, Min Yin<sup>a, \*</sup>, Hao Zhou<sup>a, \*</sup> and Zhong-Tao Ding<sup>a, c</sup>

Correspondence to: [yinmin@ynu.edu.cn](mailto:yinmin@ynu.edu.cn); [haozhou@ynu.edu.cn](mailto:haozhou@ynu.edu.cn)

This PDF file includes:

Supplementary text

Figures S1 to S32

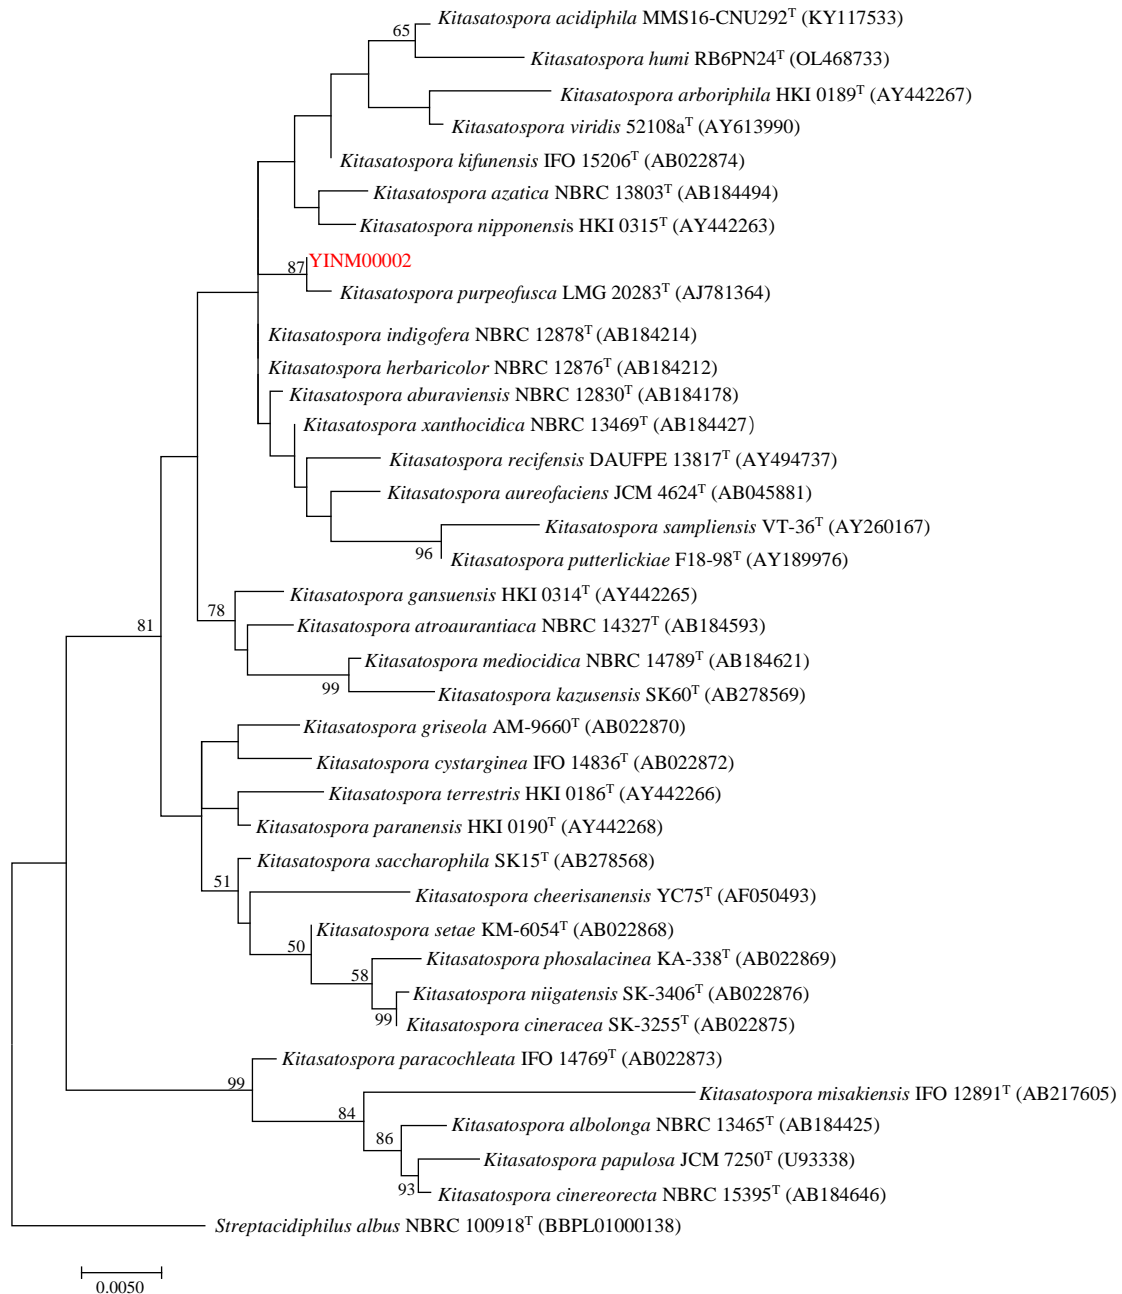

Fig. S1. Maximum-likelihood tree (MEGA 7.0) showing the relationships between strain YINM00002 and related members of the genus *Kitasatospora*. Bootstrap values (>50%) based on 1000 replicates are shown at the branch nodes. *Streptacidiphilus albus* NBRC 100918<sup>T</sup> was used as the outgroup. Bar, 0.5% sequence divergence.

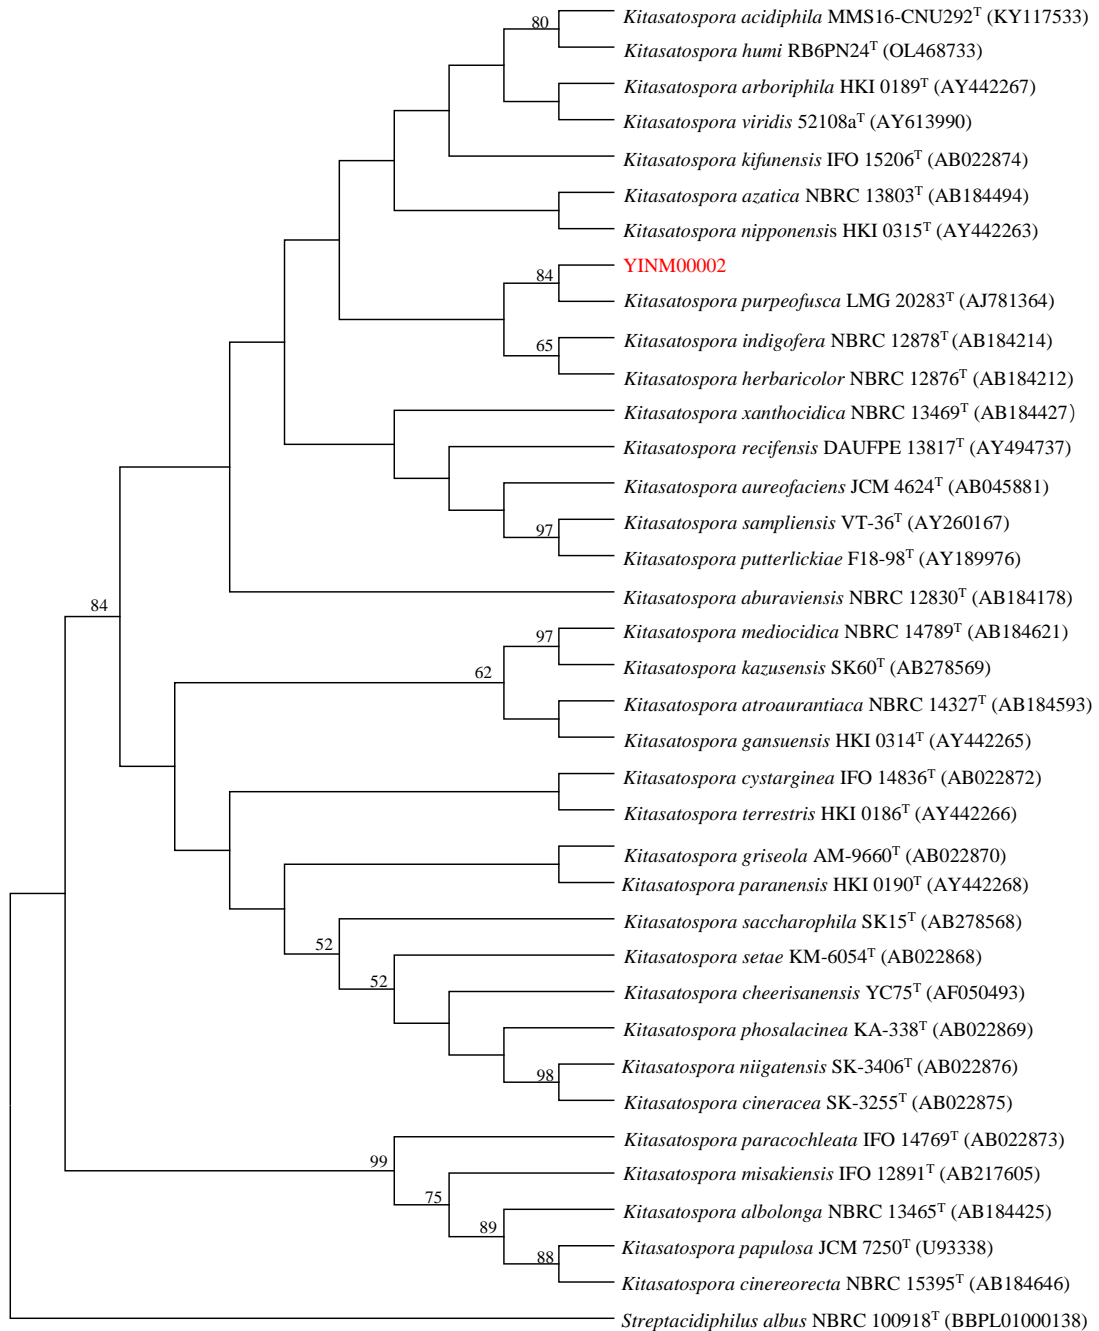

Fig. S2. Maximum-parsimony tree (MEGA 7.0) showing the relationships between strain YINM00002 and related members of the genus *Kitasatospora*. Bootstrap values (>50%) based on 1000 replicates are shown at the branch nodes. *Streptacidiphilus albus* NBRC 100918<sup>T</sup> was used as the outgroup.

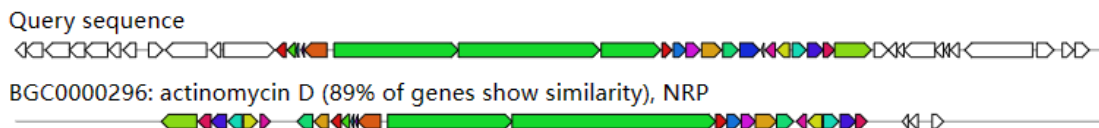

Fig. S3. The similarity of actinomycin D biosynthetic gene cluster in YINM00002 with the known one.

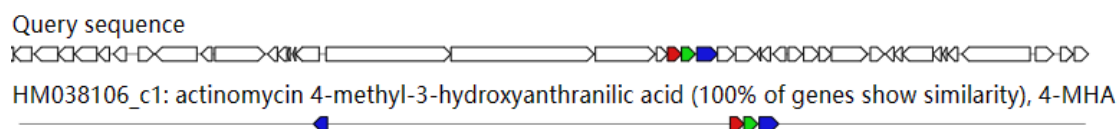

Fig. S4. The genes from actinomycin D biosynthetic gene cluster were high similar to 4-MHA biosynthetic genes.

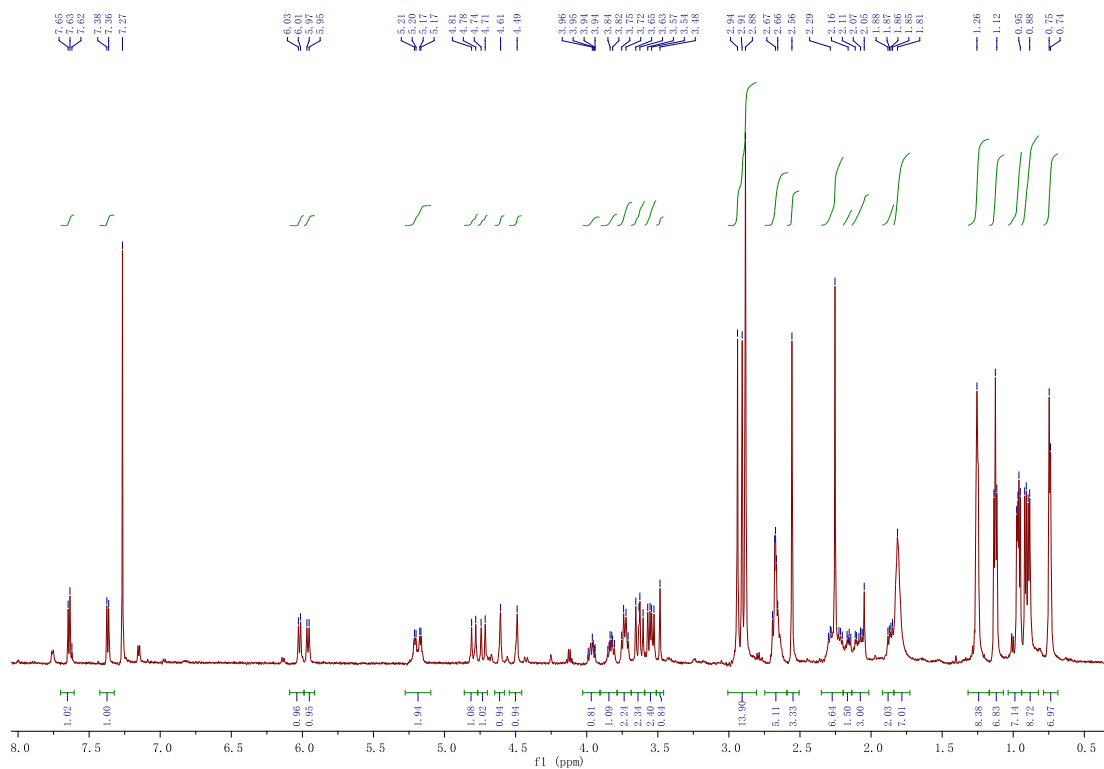

Fig. S5.  $^1\text{H}$  NMR (600 MHz) spectrum of actinomycin D (**1**, in  $\text{CDCl}_3-d$ )

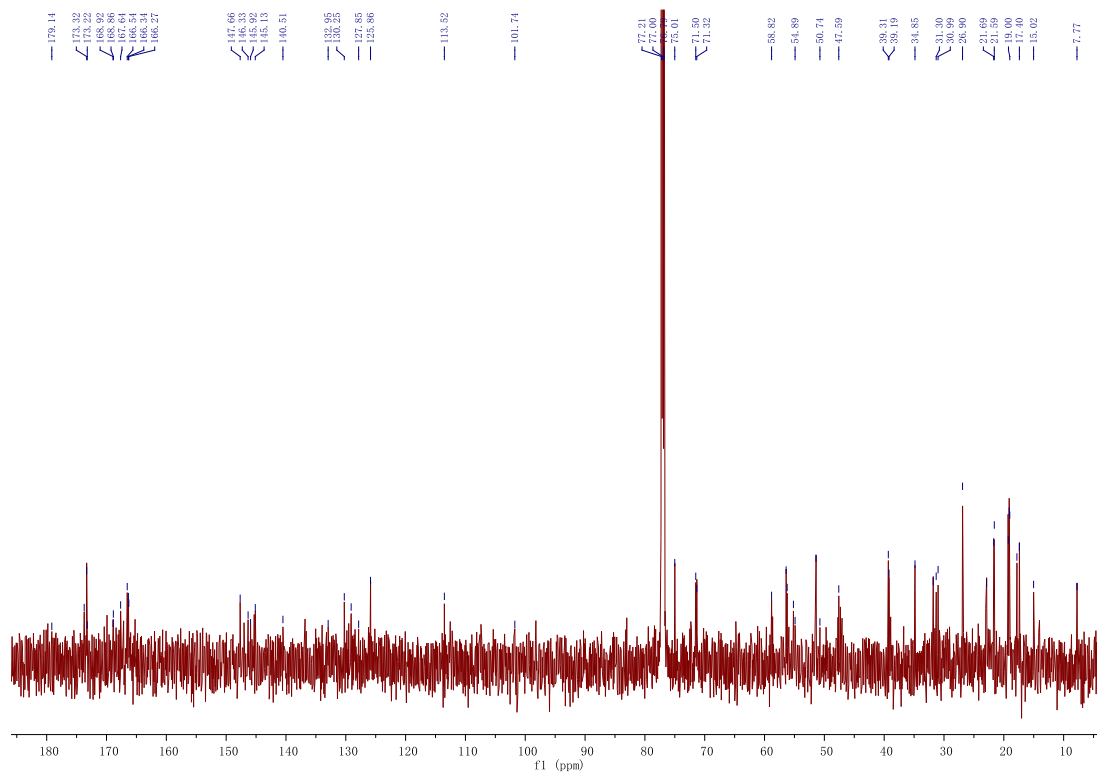

Fig. S6.  $^{13}\text{C}$  NMR (150 MHz) spectrum of actinomycin D (**1**, in  $\text{CDCl}_3\text{-}d$ )

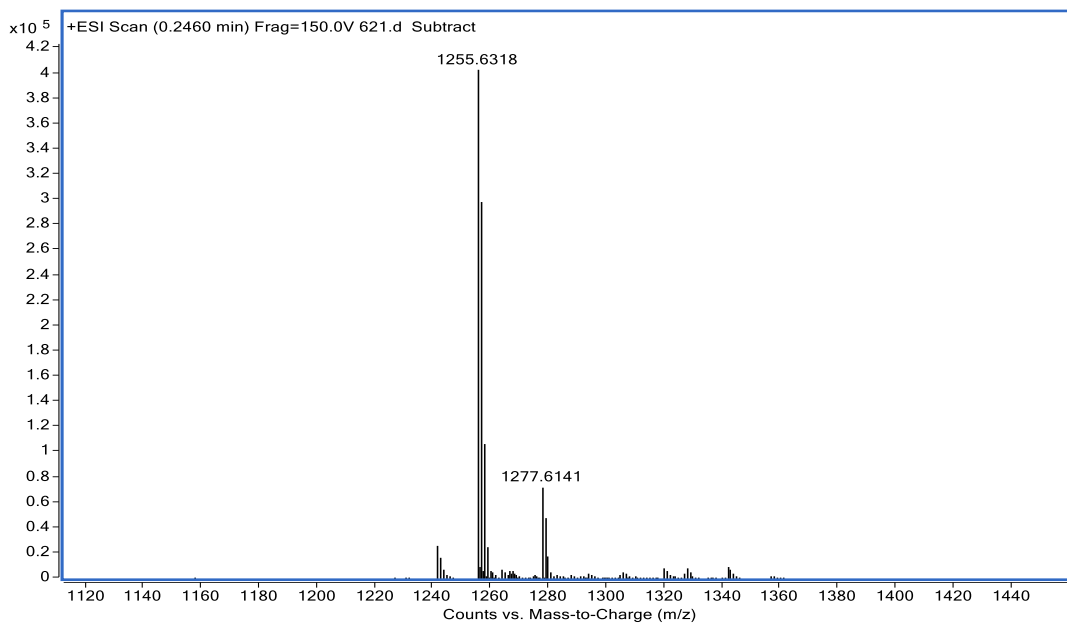

Fig. S7. (+) HRESIMS data of actinomycin D (**1**)

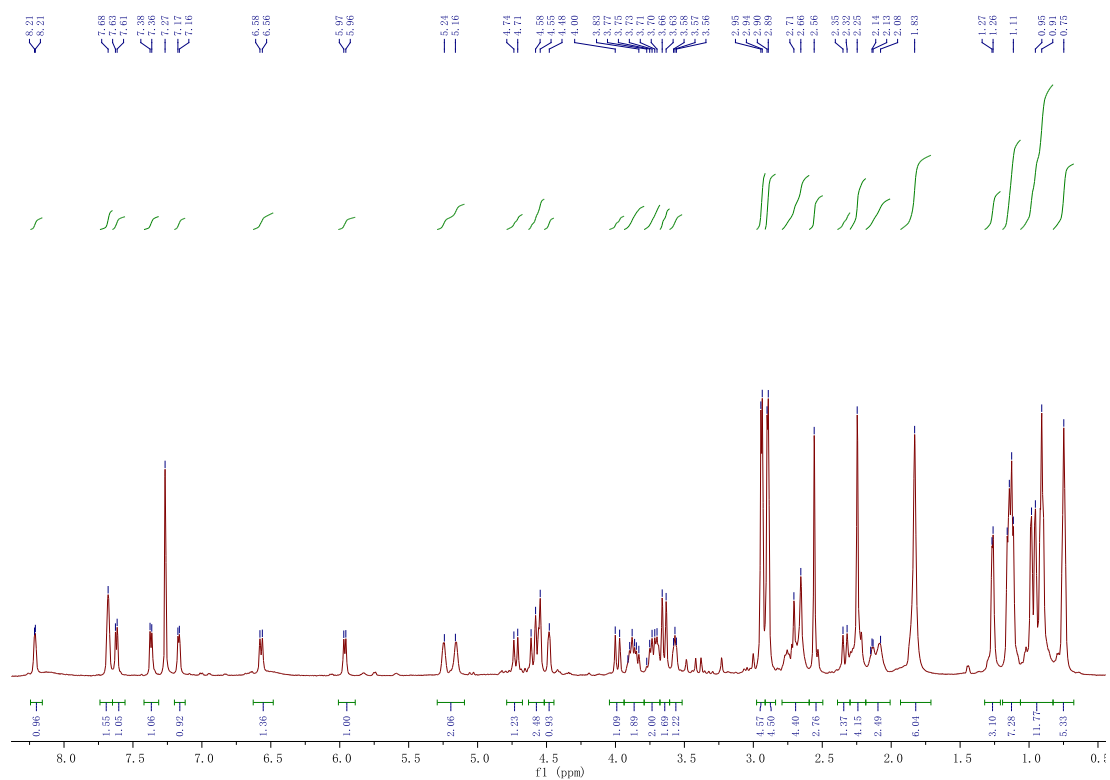

Fig. S8.  $^1\text{H}$  NMR (600 MHz) spectrum of actinomycin V (**2**, in  $\text{CDCl}_3-d$ )

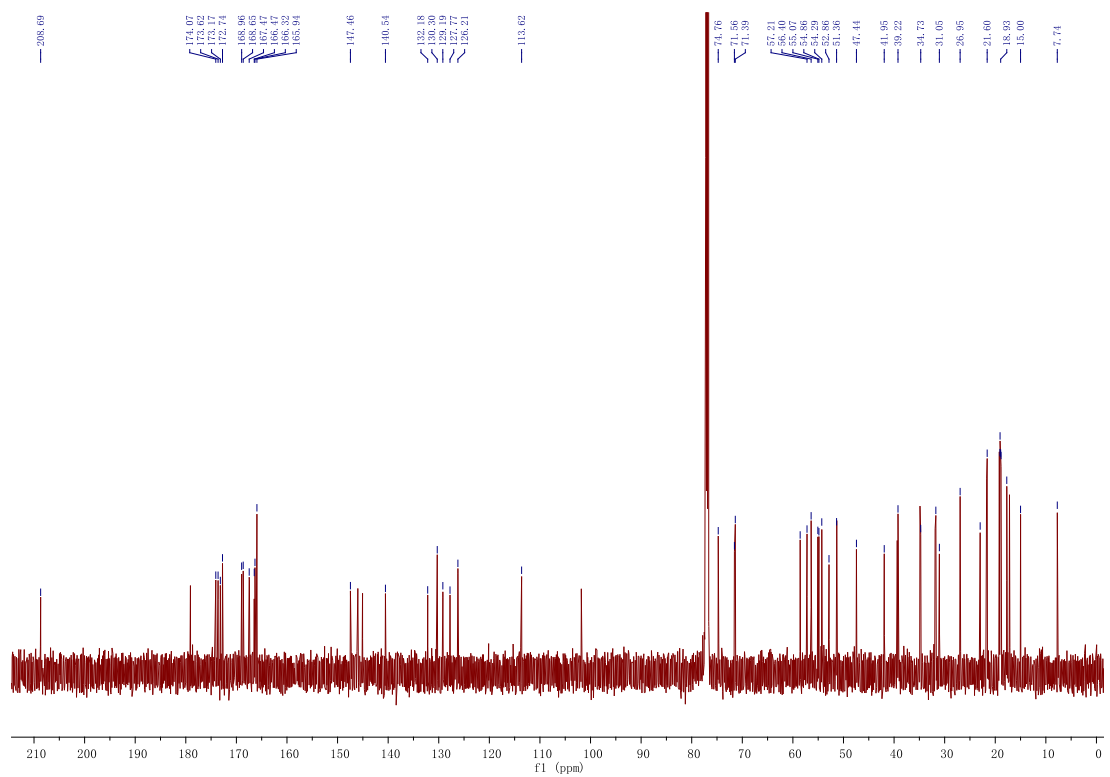

Fig. S9.  $^{13}\text{C}$  NMR (150 MHz) spectrum of actinomycin V (**2**, in  $\text{CDCl}_3-d$ )

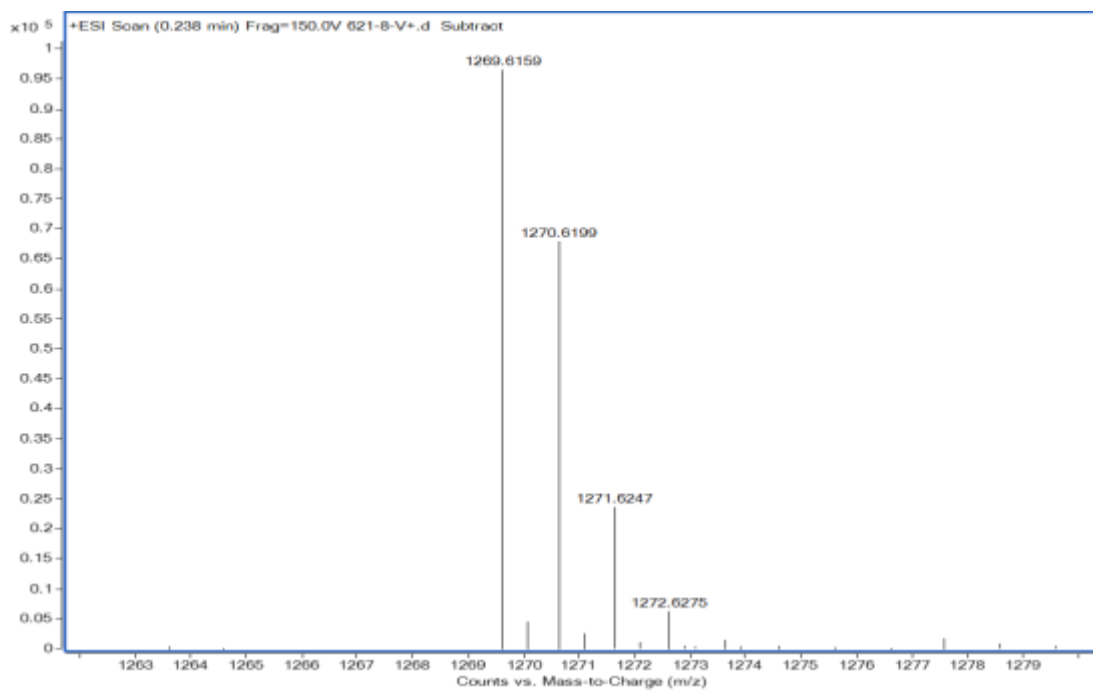

Fig. S10. (+) HRESIMS data of actinomycin V (2)

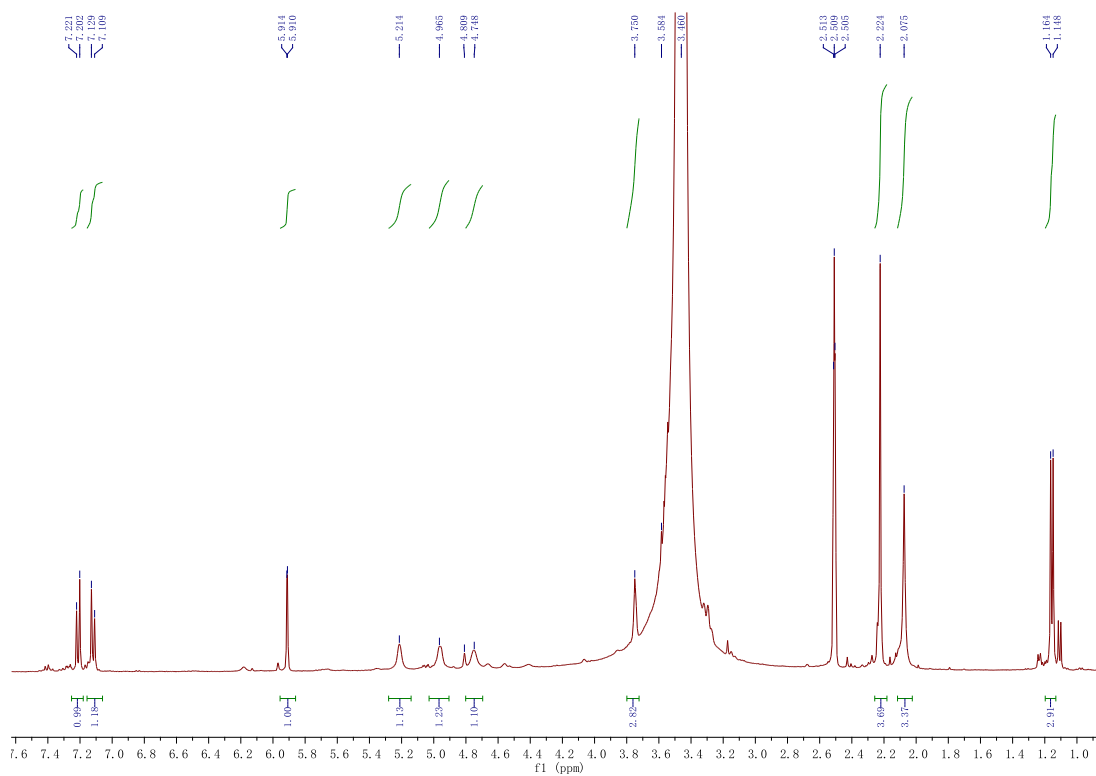

Fig. S11. <sup>1</sup>H NMR (400 MHz) spectrum of actinrhater A (3, in DMSO-d<sub>6</sub>)

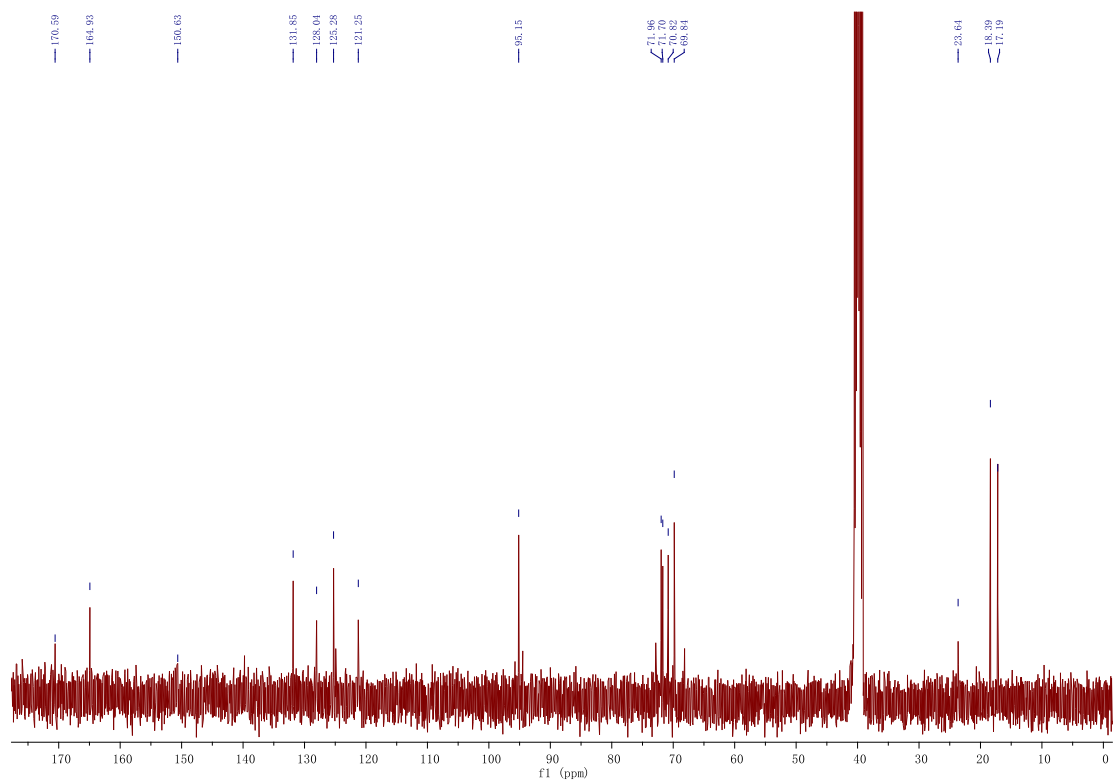

Fig. S12.  $^{13}\text{C}$  NMR (100 MHz) spectrum of actinrhater A (**3**, in  $\text{DMSO-}d_6$ )

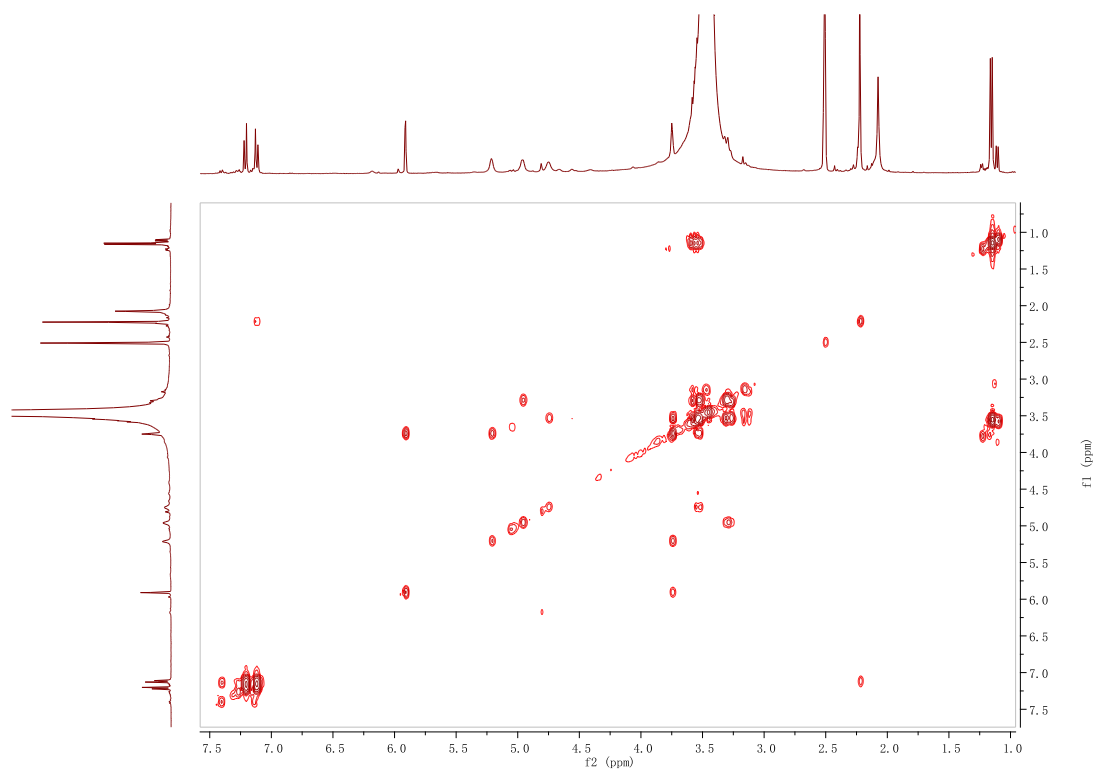

Fig. S13. COSY spectrum (400 MHz) of actinrhater A (**3**, in  $\text{DMSO-}d_6$ )



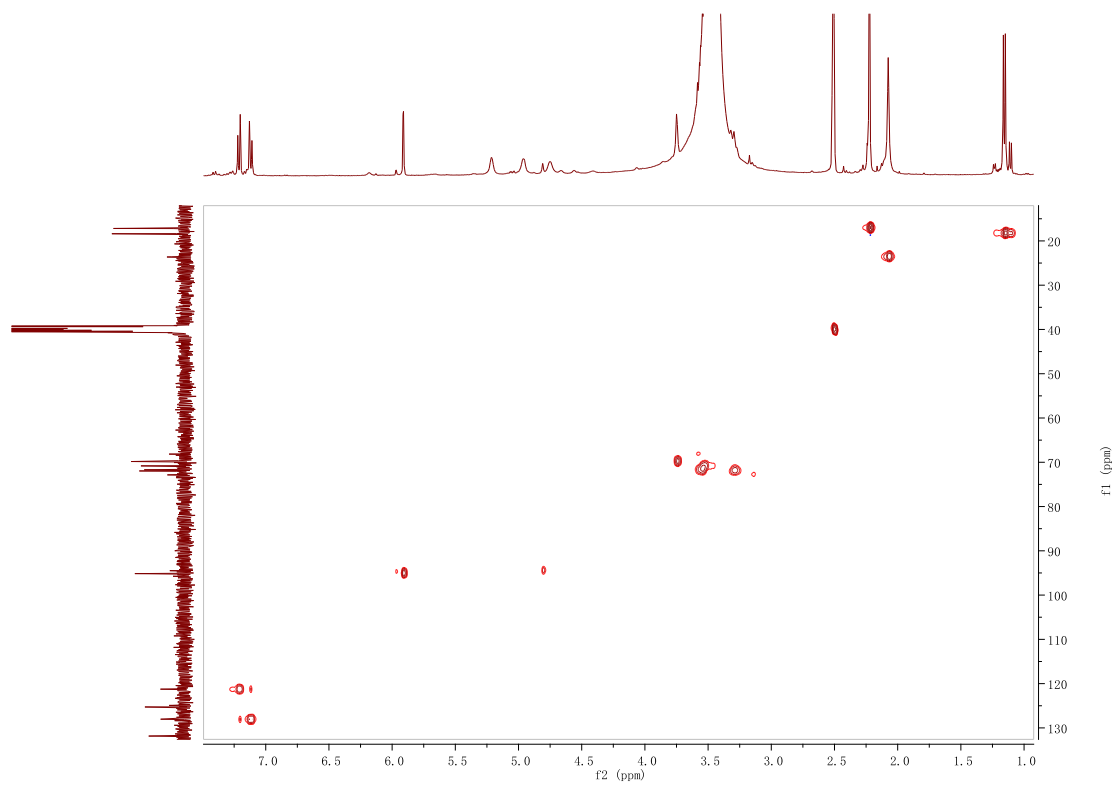

Fig. S14. HSQC spectrum (400 MHz) of actinrhater A (**3**, in DMSO- $d_6$ )

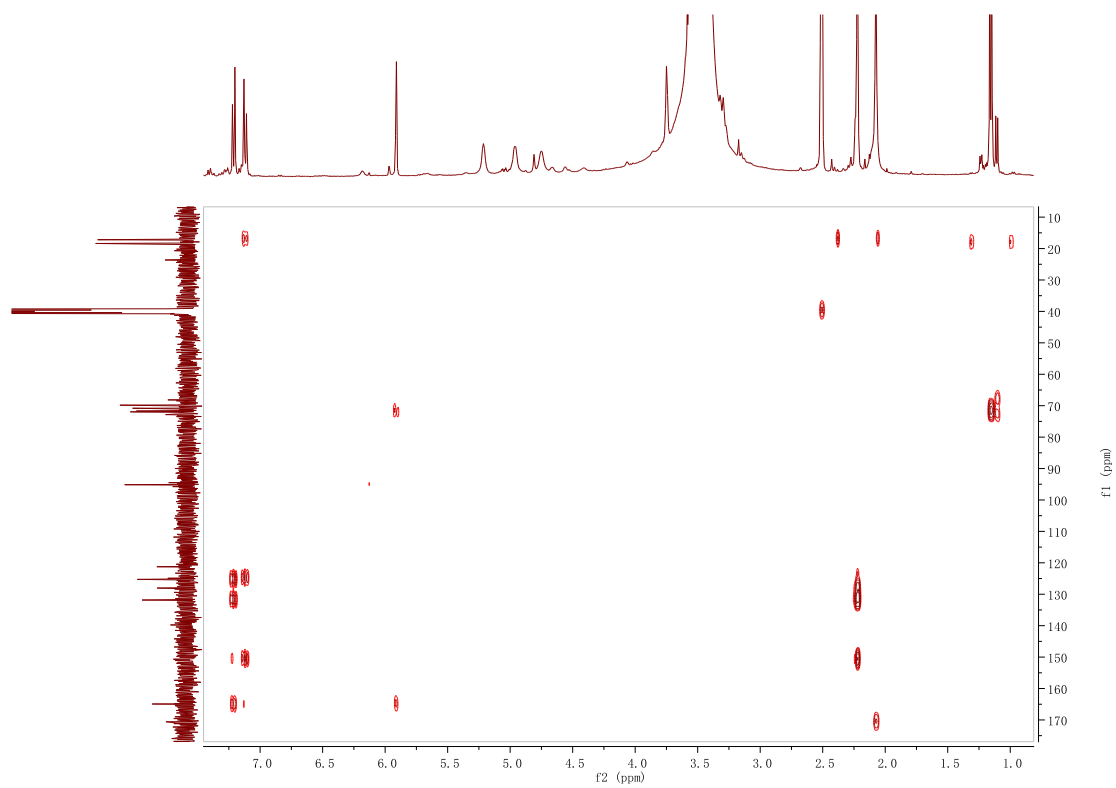

Fig. S15. HMBC spectrum (400 MHz) of actinrhater A (**3**, in DMSO- $d_6$ )

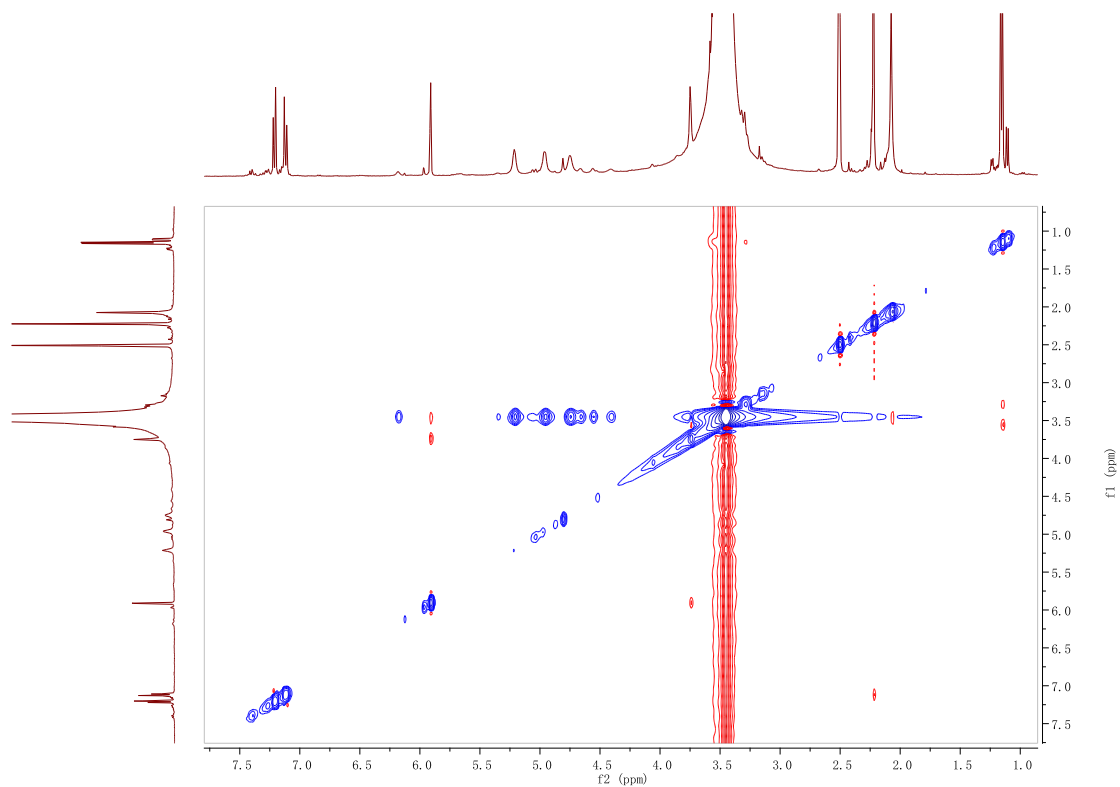

Fig. S16. NOESY spectrum (400 MHz) of actinrhater A (**3**, in DMSO- $d_6$ )

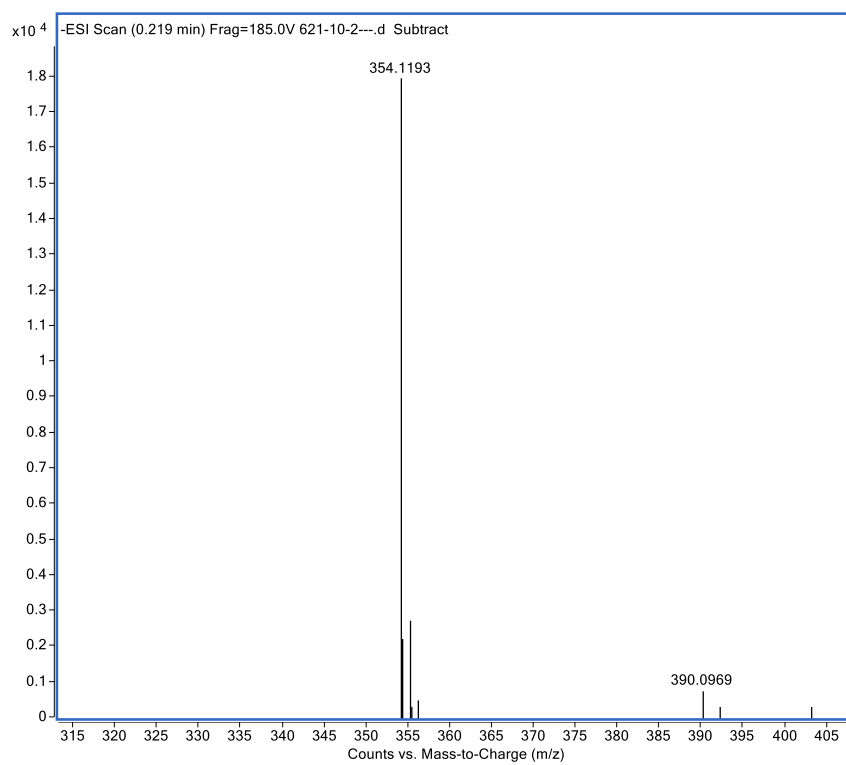

Fig. S17. (-) HRESIMS data of actinrhater A (**3**)

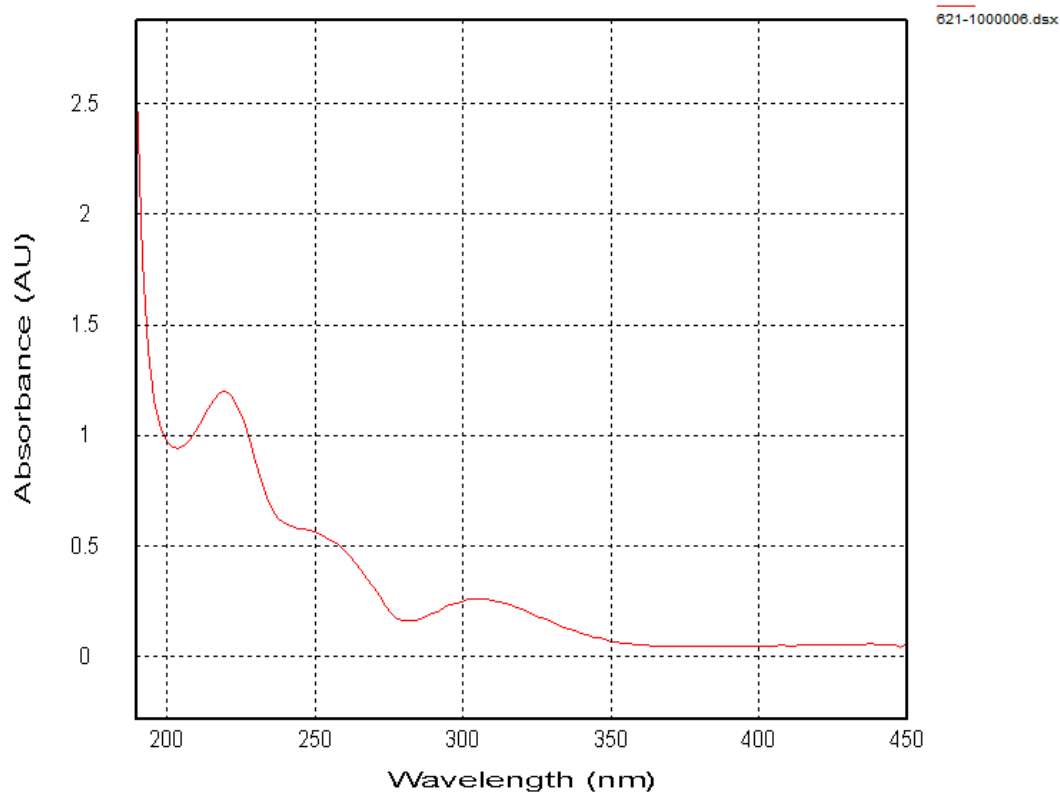

Fig. S18. The UV spectrum of actinrhater A (3)

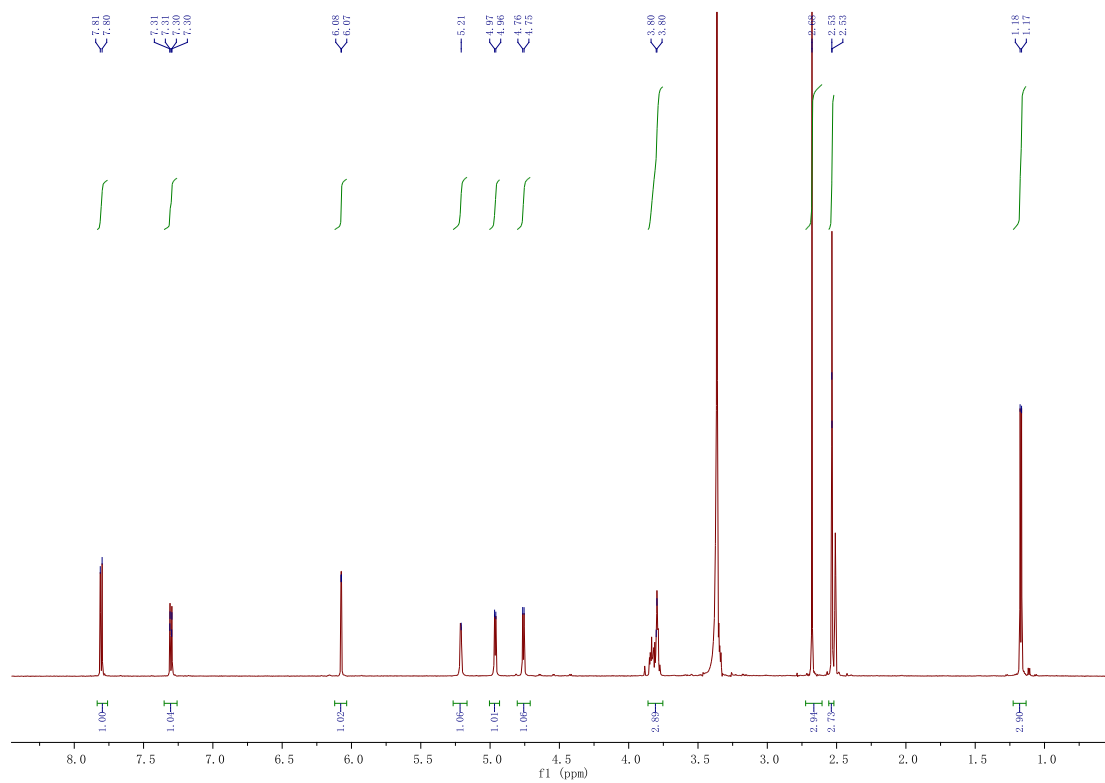

Fig. S19. <sup>1</sup>H NMR (600 MHz) spectrum of actinrhater B (4, in DMSO-*d*<sub>6</sub>)

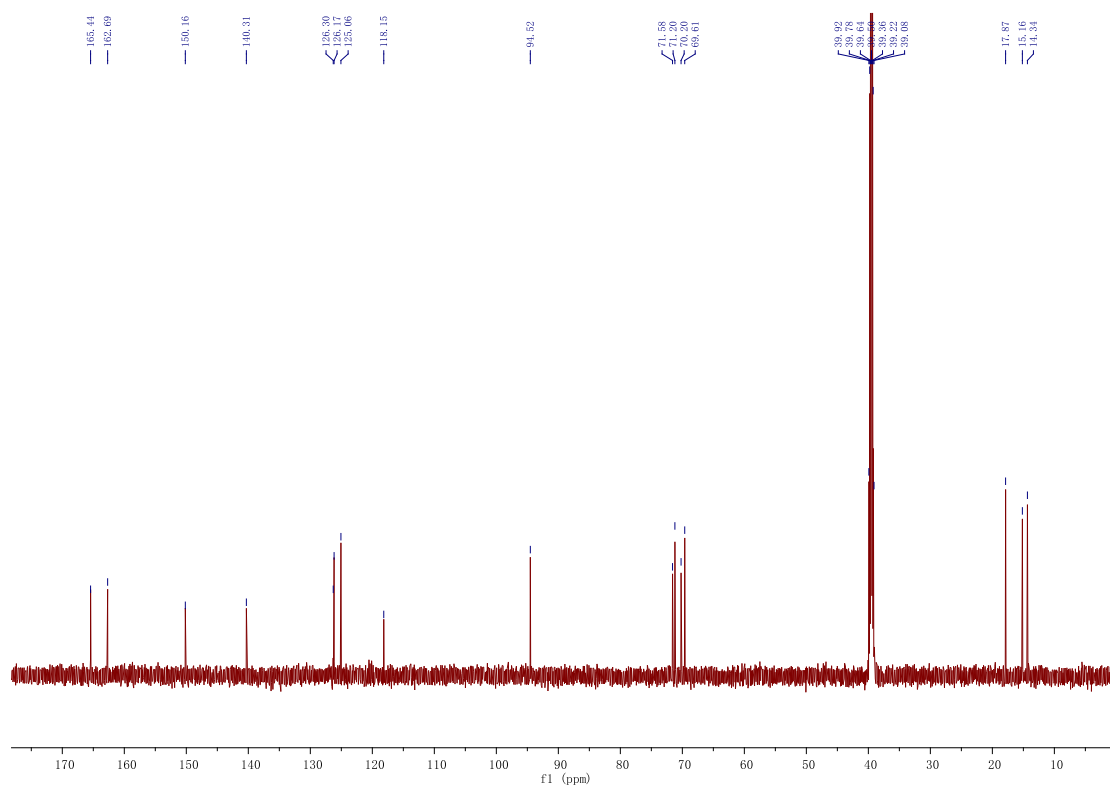

Fig. S20.  $^{13}\text{C}$  NMR (150 MHz) spectrum of actinrhater B (**4**, in  $\text{DMSO-}d_6$ )

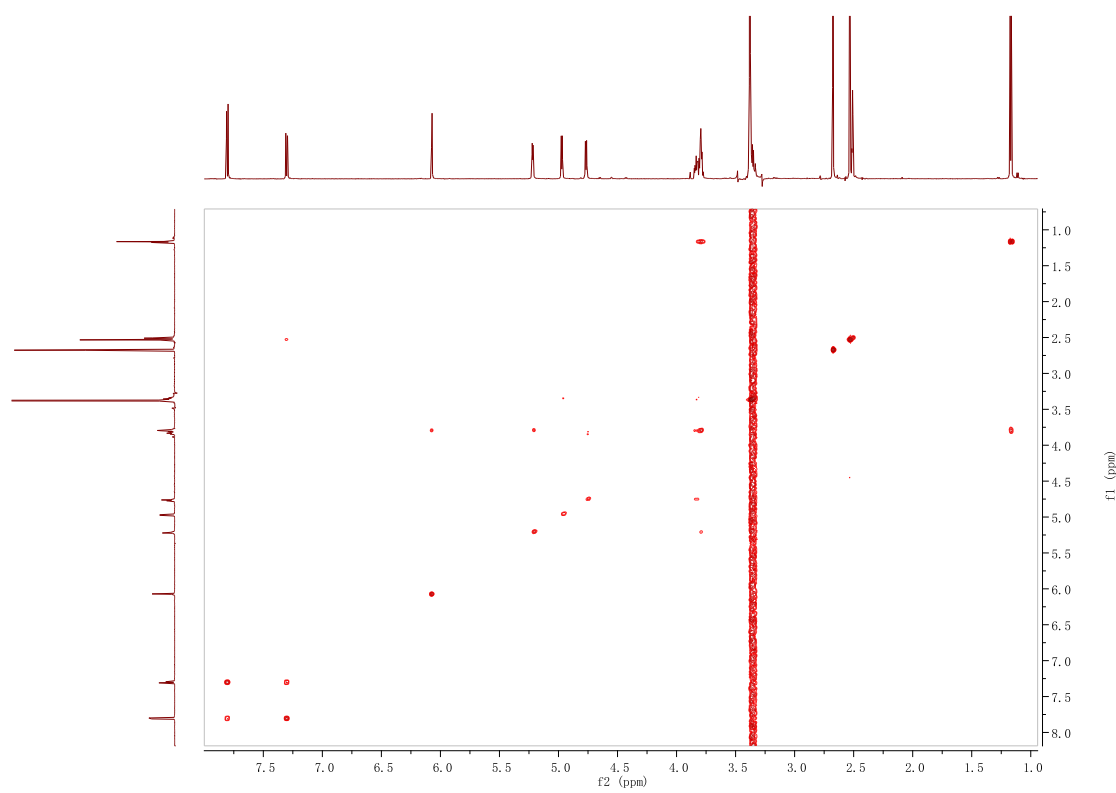

Fig. S21. COSY (600 MHz) spectrum of actinrhater B (**4**, in  $\text{DMSO-}d_6$ )

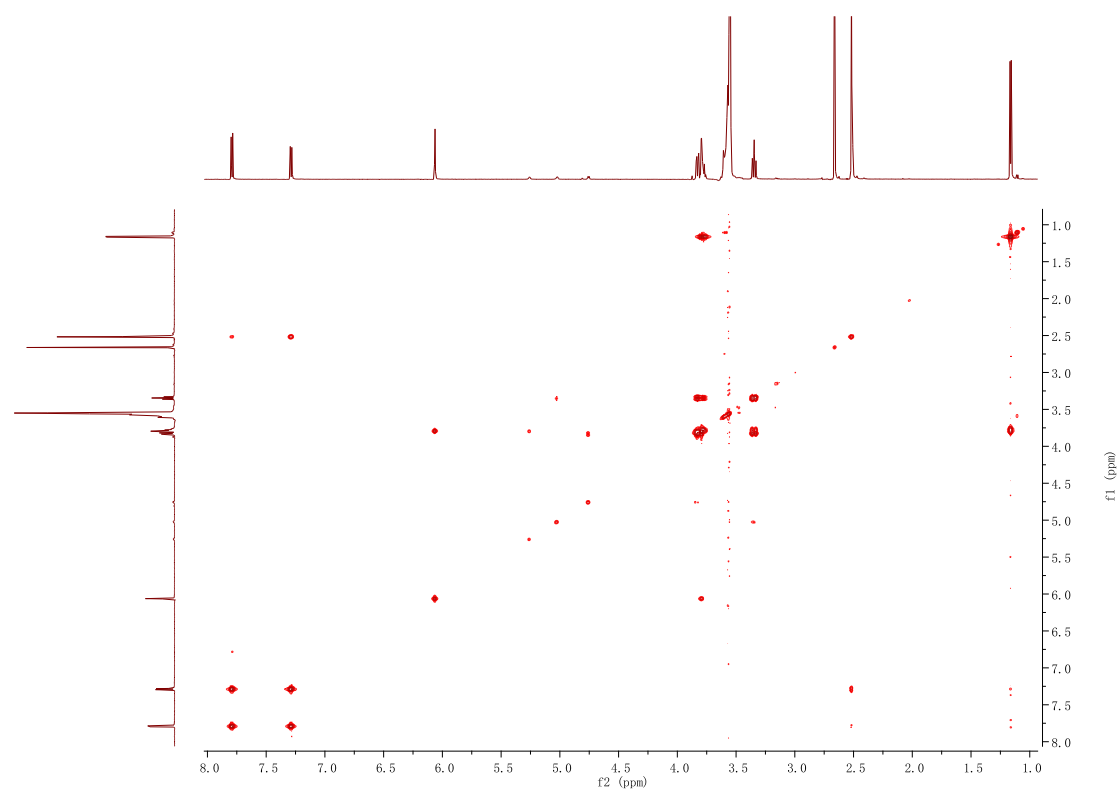

Fig. S22. COSY (600 MHz) spectrum of actinrhater B (**4**, in DMSO- $d_6$  + D $_2$ O)

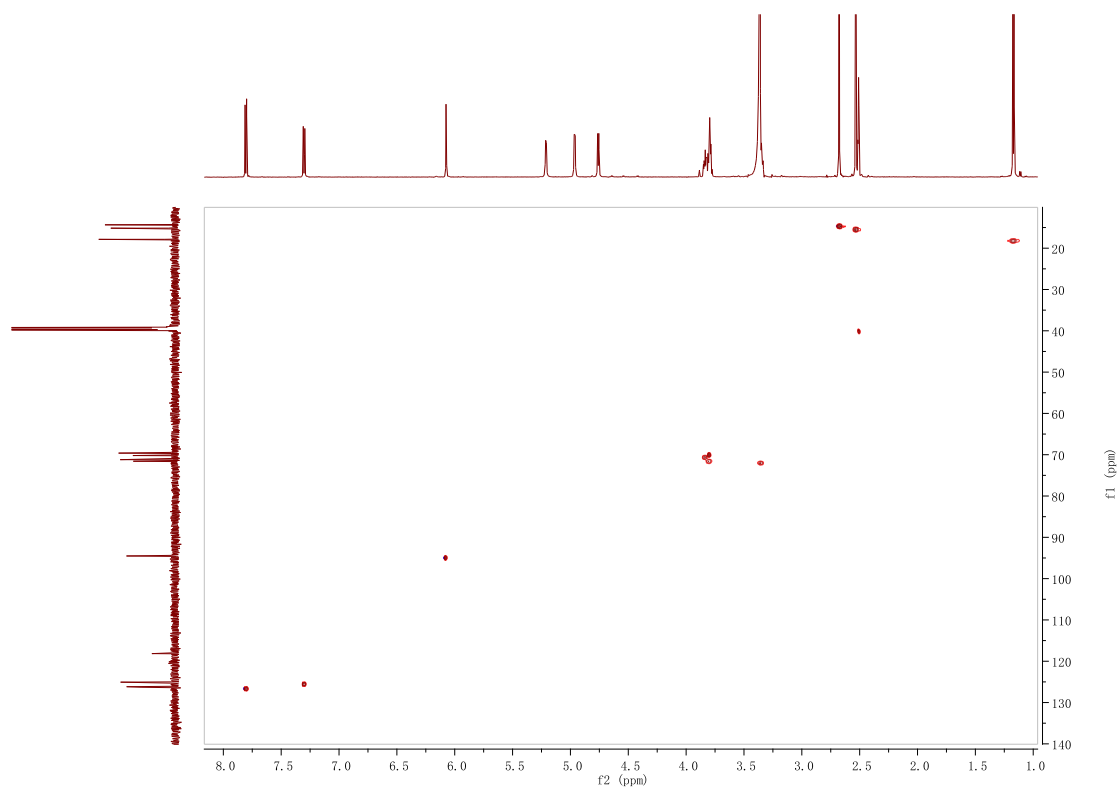

Fig. S23. HSQC (600 MHz) spectrum of actinrhater B (**4**, in DMSO- $d_6$ )

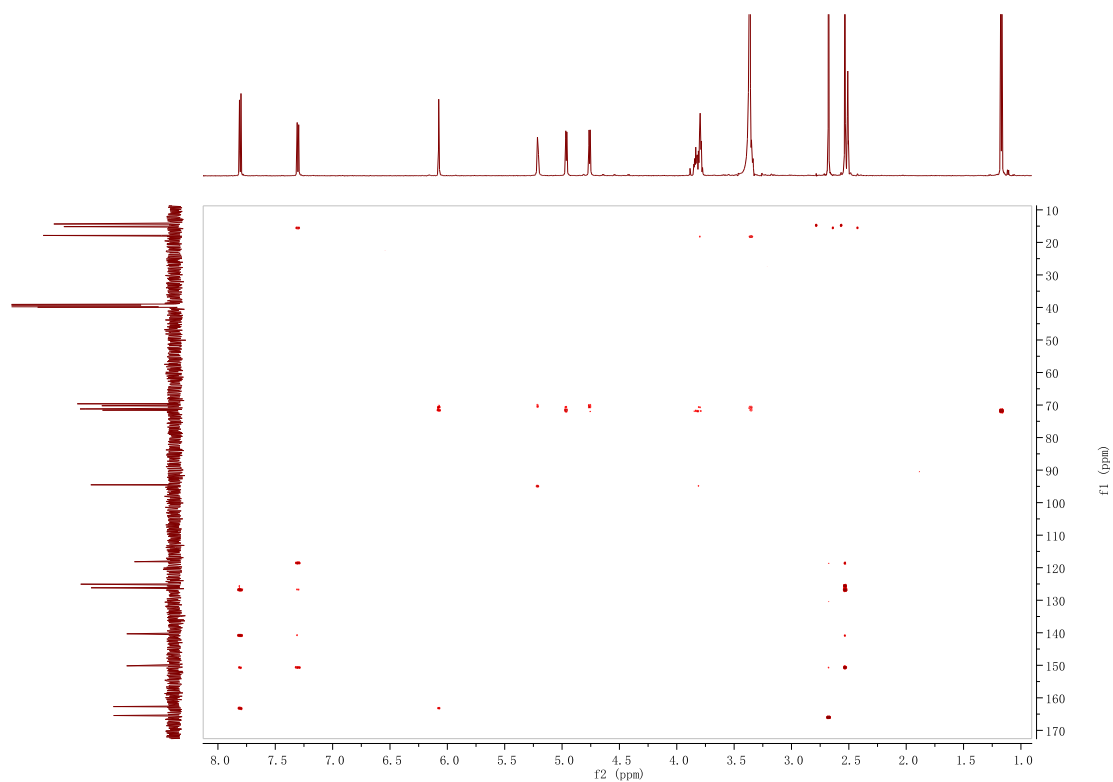

Fig. S24. HMBC (600 MHz) spectrum of actinrhater B (**4**, in DMSO- $d_6$ )

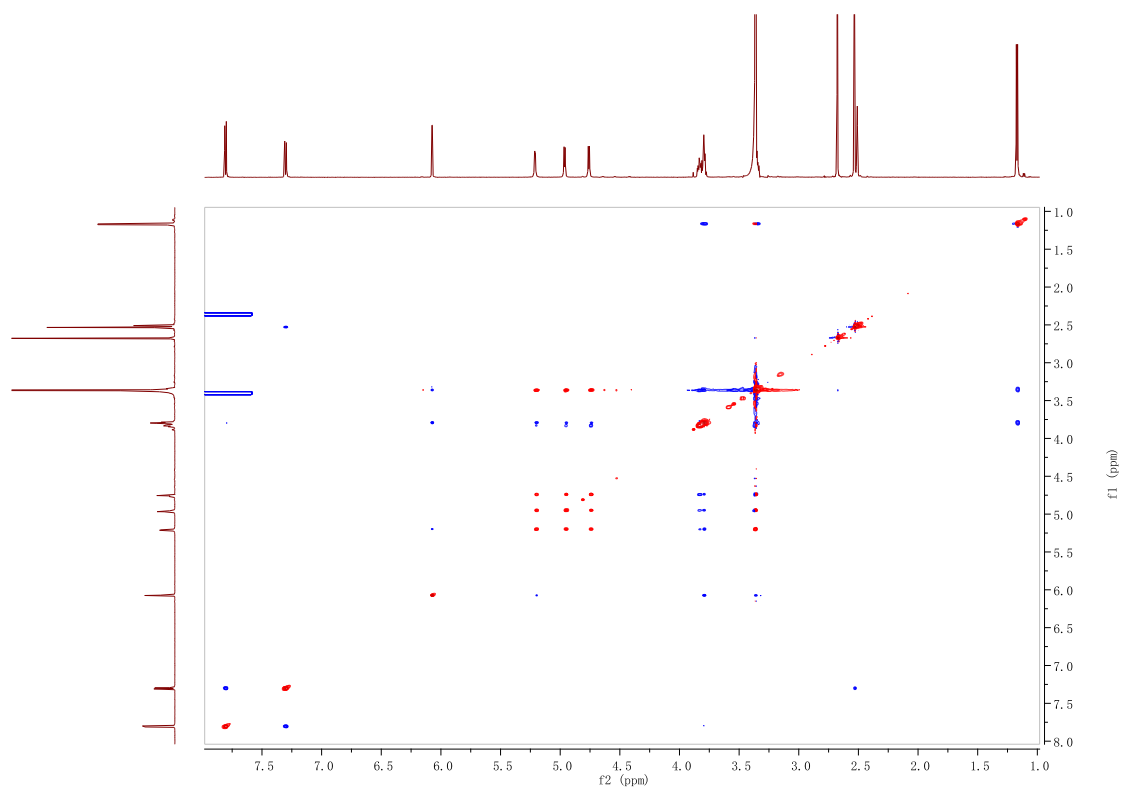

Fig. S25. ROESY (600 MHz) spectrum of actinrhater B (**4**, in DMSO- $d_6$ )

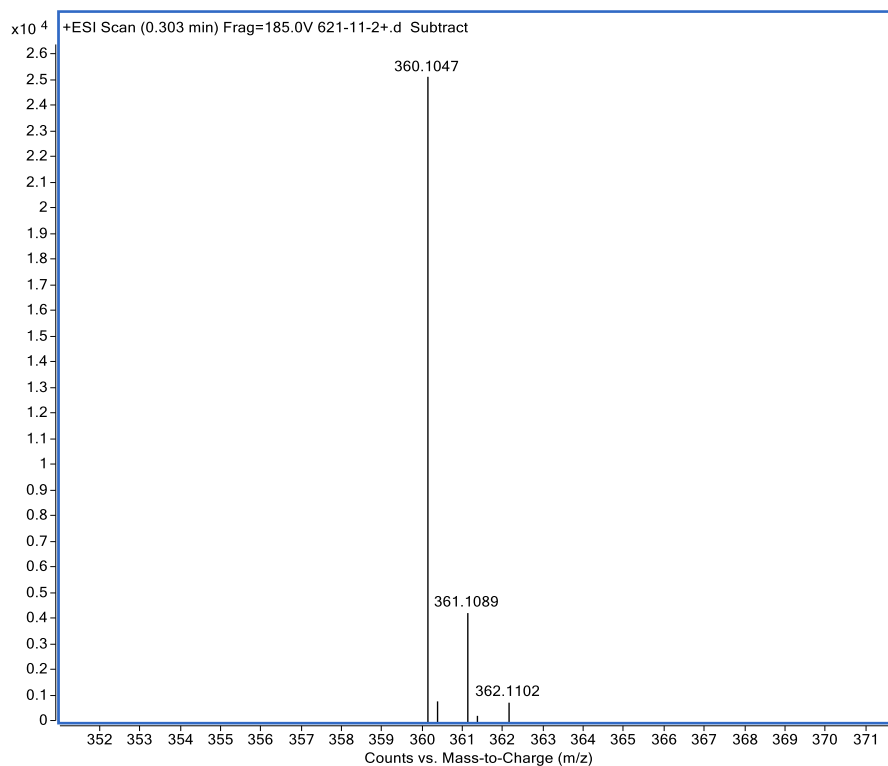

Fig. S26. (+) HRESIMS data of actinrhater B (4)

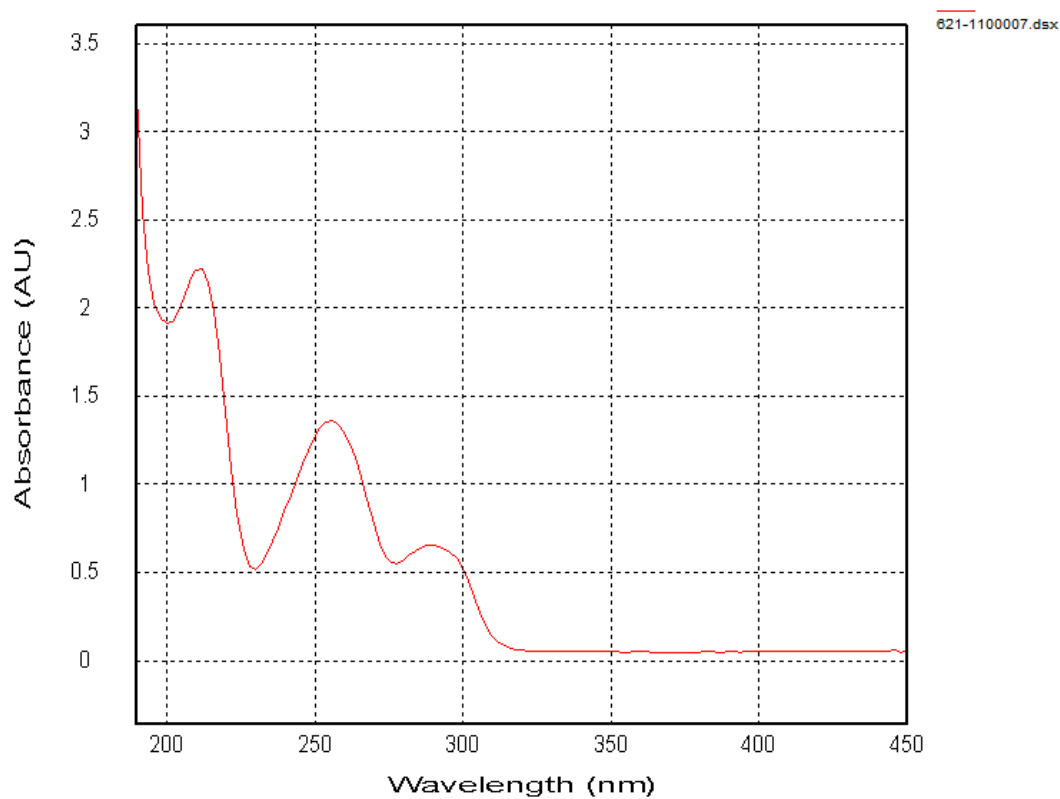

Fig. S27. The UV spectrum of actinrhater B (4)

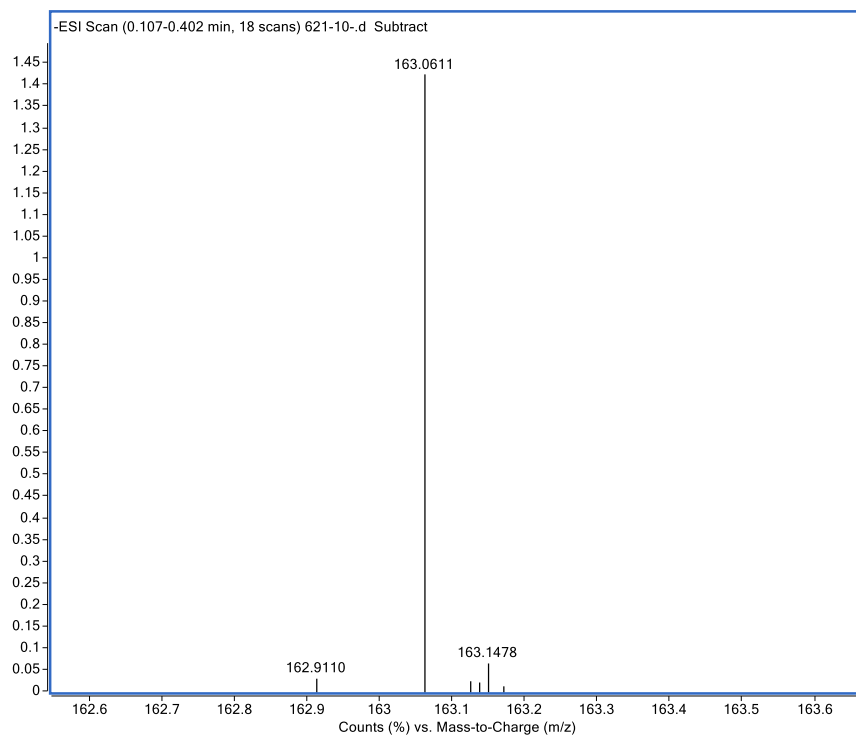

Fig. S28. (-) HRESIMS data of rhamnose from actinrhater A (3)

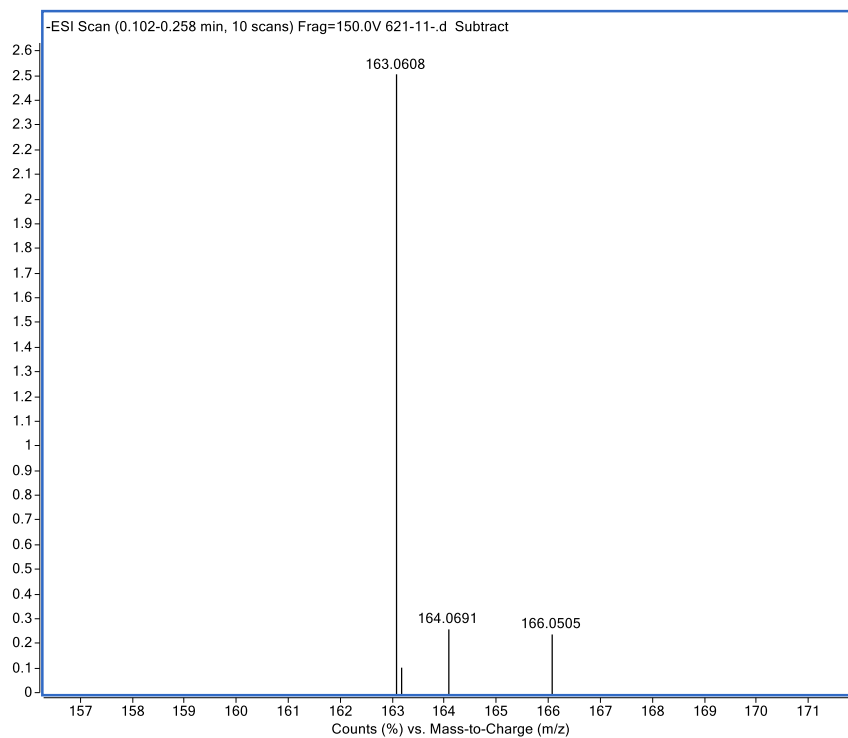

Fig. S29. (-) HRESIMS data of rhamnose from actinrhater B (4)



**Rudolph Research Analytical**

This sample was measured by Autopol IV, Serial Number: 83650  
Manufactured by Rudolph Research Analytical, Hackettstown, NJ, USA.

Measurement Date : 2022/11/11  
Method Name : Specific Rotation @25C  
Lot Identifier : L-SLT  
Set Temperature : 25.0°C  
Time Delay : 5  
Delay between measurement : 2 Sec

| N | Avg.   | Std.Dev. | %RSD  | Min    | Max    |
|---|--------|----------|-------|--------|--------|
| 5 | -4.920 | 0.438    | -8.90 | -5.400 | -4.600 |

| S.No | Time     | Result | Scale | OR °Arc | WLG.nm | Lg.mm | Temp   |
|------|----------|--------|-------|---------|--------|-------|--------|
| 1    | 11:24:16 | -4.600 | SR    | -0.0046 | 589    | 100   | 25.0°C |
| 2    | 11:24:24 | -5.400 | SR    | -0.0054 | 589    | 100   | 25.0°C |
| 3    | 11:24:32 | -5.400 | SR    | -0.0054 | 589    | 100   | 25.0°C |
| 4    | 11:24:39 | -4.600 | SR    | -0.0046 | 589    | 100   | 25.0°C |
| 5    | 11:24:47 | -4.600 | SR    | -0.0046 | 589    | 100   | 25.0°C |

Fig. S30. The rotation values of L-rhamnose-standard (0.1 mg/mL).

**Rudolph Research Analytical**

This sample was measured by Autopol IV, Serial Number: 83650  
Manufactured by Rudolph Research Analytical, Hackettstown, NJ, USA.

Measurement Date : 2022/11/11  
Method Name : Specific Rotation @25C  
Lot Identifier : 621-10-1  
Set Temperature : 25.0°C  
Time Delay : 5  
Delay between measurement : 2 Sec

| N | Avg.   | Std.Dev. | %RSD  | Min    | Max    |
|---|--------|----------|-------|--------|--------|
| 5 | -8.560 | 0.428    | -5.00 | -9.000 | -8.100 |

| S.No | Time     | Result | Scale | OR °Arc | WLG.nm | Lg.mm | Temp   |
|------|----------|--------|-------|---------|--------|-------|--------|
| 1    | 11:35:01 | -9.000 | SR    | -0.0090 | 589    | 100   | 25.0°C |
| 2    | 11:35:09 | -8.100 | SR    | -0.0081 | 589    | 100   | 25.0°C |
| 3    | 11:35:17 | -8.800 | SR    | -0.0088 | 589    | 100   | 25.0°C |
| 4    | 11:35:25 | -8.100 | SR    | -0.0081 | 589    | 100   | 25.0°C |
| 5    | 11:35:33 | -8.800 | SR    | -0.0088 | 589    | 100   | 25.0°C |

Fig. S31. The rotation values of rhamnose actinrhater A (3) (0.1 mg/mL).

**Rudolph Research Analytical**

This sample was measured by Autopol IV, Serial Number: 83650  
Manufactured by Rudolph Research Analytical, Hackettstown, NJ, USA.

Measurement Date : 2022/11/11  
Method Name : Specific Rotation @25C  
Lot Identifier : 621-11  
Set Temperature : 25.0°C  
Time Delay : 5  
Delay between measurement : 2 Sec

| <b>N</b> | <b>Avg.</b> | <b>Std.Dev.</b> | <b>%RSD</b> | <b>Min</b> | <b>Max</b> |
|----------|-------------|-----------------|-------------|------------|------------|
| 5        | -6.864      | 0.173           | -2.51       | -7.100     | -6.640     |

  

| <b>S.No</b> | <b>Time</b> | <b>Result</b> | <b>Scale</b> | <b>OR °Arc</b> | <b>WLG.nm</b> | <b>Lg.mm</b> | <b>Temp</b> |
|-------------|-------------|---------------|--------------|----------------|---------------|--------------|-------------|
| 1           | 11:44:10    | -7.100        | SR           | -0.0355        | 589           | 100          | 25.0°C      |
| 2           | 11:44:18    | -6.940        | SR           | -0.0347        | 589           | 100          | 25.0°C      |
| 3           | 11:44:26    | -6.940        | SR           | -0.0347        | 589           | 100          | 25.0°C      |
| 4           | 11:44:34    | -6.800        | SR           | -0.0340        | 589           | 100          | 25.0°C      |
| 5           | 11:44:42    | -6.640        | SR           | -0.0332        | 589           | 100          | 25.0°C      |

Fig. S32. The rotation values of rhamnose from actinrhater B (4) (0.1 mg/mL).
